# Supplementary material
Source: PubMed Central journal article supplement (PMC7851700)
Supplement: AEM.02647-20-s0001.pdf [file AEM.02647-20-s0001.pdf]

## Supplementary information

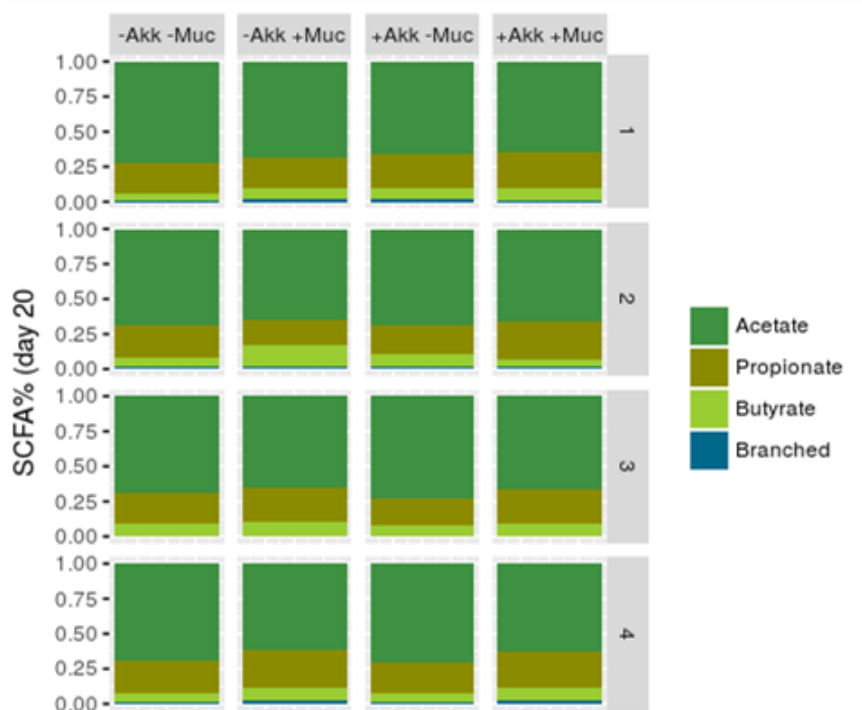

Supplementary Figure 1: Proportions of acetate, propionate, butyrate and branched SCFA for the different donors and treatments at day 20.

Supplementary Table 1: RDP Seqmatch and NCBI BLAST results for the most abundant and relevant species in the microbial communities, as determined by amplicon sequencing. The similarity score (Sab) as calculated by RDP, and the NCBI BLAST output for the best hit and the next best hit(s) are shown.

|             |                                        | RDP | NCBI BLAST         |         |              |
|-------------|----------------------------------------|-----|--------------------|---------|--------------|
|             |                                        | Sab | Query coverage (%) | E-score | Identity (%) |
| <b>OTU1</b> | <i>Escherichia/Shigella fergusonii</i> | 1   | 100                | 0       | 100          |
|             | <i>Escherichia/Shigella flexneri</i>   | 1   | 100                | 0       | 100          |
|             | <i>Shigella sonnei</i>                 | 1   | 100                | 0       | 100          |
| <b>OTU2</b> | <i>Clostridium bolteae</i>             | 1   | 100                | 0       | 100          |

|              |                                            |       |     |        |     |
|--------------|--------------------------------------------|-------|-----|--------|-----|
|              | <i>Clostridium clostridioforme</i>         | 0,977 | 100 | 0      | 100 |
|              | <i>Clostridium citroniae</i>               | 0,964 | 100 | 0      | 99  |
| <b>OTU3</b>  | <i>Bacteroides ovatus</i>                  | 0,961 | 100 | 0      | 99  |
|              | <i>Bacteroides xylanisolvens</i>           | 0,891 | 100 | 0      | 98  |
| <b>OTU4</b>  | <i>Fusobacterium varium</i>                | 0,995 | 100 | 0      | 100 |
|              | <i>Fusobacterium ulcerans</i>              | 0,928 | 100 | 0      | 99  |
| <b>OTU5</b>  | <i>Bacteroides uniformis</i>               | 1     | 100 | 0      | 100 |
|              | <i>Bacteroides rodentium</i>               | 0,906 | 100 | 0      | 97  |
| <b>OTU6</b>  | <i>Bacteroides dorei</i>                   | 1     | 100 | 0      | 100 |
|              | <i>Bacteroides vulgatus</i>                | 0,954 | 100 | 0      | 99  |
| <b>OTU7</b>  | <i>Bilophila wadsworthia</i>               | 0,973 |     |        |     |
|              | <i>Desulfovibrio simplex</i>               | 0,701 | 100 | 9E-173 | 92  |
| <b>OTU8</b>  | <i>Kluyvera cryocrescens</i>               | 0,983 | 100 | 0      | 99  |
|              | <i>Enterobacter aerogenes</i>              | 0,947 | 100 | 0      | 99  |
| <b>OTU9</b>  | <i>Akkermansia muciniphila</i>             | 1     | 100 | 0      | 100 |
|              | <i>Verrucomicrobium spinosum</i>           | 0,567 | 99  | 3E-107 | 84  |
| <b>OTU10</b> | <i>Phascolarctobacterium succinatutens</i> | 0,985 | 100 | 0      | 99  |
|              | <i>Phascolarctobacterium faecium</i>       | 0,723 | 100 | 0      | 94  |
| <b>OTU11</b> | <i>Bacteroides thetaiotaomicron</i>        | 1     | 100 | 0      | 100 |
|              | <i>Bacteroides faecichinchillae</i>        | 0,947 | 100 | 0      | 99  |
| <b>OTU12</b> | <i>Fusobacterium nucleatum</i>             | 0,982 | 100 | 0      | 99  |
|              | <i>Fusobacterium simiae</i>                | 0,946 | 100 | 0      | 99  |
| <b>OTU13</b> | <i>Cloacibacillus porcorum</i>             | 0,929 | 100 | 0      | 99  |
|              | <i>Cloacibacillus evryensis</i>            | 0,837 | 100 | 0      | 96  |
| <b>OTU14</b> | <i>Alistipes onderdonkii</i>               | 1     | 100 | 0      | 100 |
|              | <i>Alistipes shahii</i>                    | 0,882 | 100 | 0      | 97  |

|              |                                         |       |     |        |     |
|--------------|-----------------------------------------|-------|-----|--------|-----|
| <b>OTU15</b> | <i>Bacteroides xylanisolvens</i>        | 1     | 100 | 0      | 100 |
|              | <i>Bacteroides acidifaciens</i>         | 0,959 | 100 | 0      | 99  |
| <b>OTU16</b> | <i>Clostridium aldenense</i>            | 0,964 | 100 | 0      | 99  |
|              | <i>Clostridium saccharolyticum</i>      | 0,869 | 100 | 0      | 98  |
| <b>OTU17</b> | <i>Veillonella tobetsuensis</i>         | 0,978 | 100 | 0      | 99  |
|              | <i>Veillonella rogosae</i>              | 0,971 | 100 | 0      | 99  |
| <b>OTU18</b> | <i>Veillonella atypica</i>              | 0,956 | 100 | 0      | 99  |
|              | <i>Veillonella dispar</i>               | 0,932 | 100 | 0      | 98  |
| <b>OTU19</b> | <i>Blautia coccoides</i>                | 1     | 100 | 0      | 100 |
|              | <i>Blautia schinkii</i>                 | 0,985 | 100 | 0      | 98  |
| <b>OTU20</b> | <i>Pseudomonas aeruginosa</i>           | 1     | 100 | 0      | 100 |
|              | <i>Pseudomonas otitidis</i>             | 959   | 100 | 0      | 99  |
| <b>OTU21</b> | <i>Parasutterella excrementihominis</i> | 1     | 100 | 0      | 100 |
|              | <i>Parasutterella secunda</i>           | 0,603 | 100 | 4E-166 | 91  |
| <b>OTU22</b> | <i>Parabacteroides distasonis</i>       | 0,956 | 100 | 0      | 99  |
|              | <i>Parabacteroides gordonii</i>         | 0,664 | 100 | 4E-171 | 92  |
| <b>OTU23</b> | <i>Citrobacter freundii</i>             | 1     | 100 | 0      | 100 |
|              | <i>Raoultella terrigena</i>             | 0,964 | 100 | 0      | 99  |
| <b>OTU24</b> | <i>Bifidobacterium adolescentis</i>     | 1     | 100 | 0      | 100 |
|              | <i>Bifidobacterium faecale</i>          | 1     | 100 | 0      | 100 |
| <b>OTU25</b> | <i>Bacteroides cellulosilyticus</i>     | 0,951 | 100 | 0      | 99  |
|              | <i>Bacteroides intestinalis</i>         | 0,92  | 100 | 0      | 99  |
| <b>OTU26</b> | <i>Clostridium hathewayi</i>            | 1     | 100 | 0      | 100 |
|              | <i>Clostridium xylanolyticum</i>        | 0,879 | 100 | 0      | 97  |
| <b>OTU27</b> | <i>Dialister invisus</i>                | 1     | 100 | 0      | 100 |
|              | <i>Dialister propionicifaciens</i>      | 0,839 | 100 | 0      | 95  |

|              |                                     |       |     |        |     |
|--------------|-------------------------------------|-------|-----|--------|-----|
| <b>OTU28</b> | <i>Insolitspirillum peregrinum</i>  | 0,525 | 99  | 2E-127 | 87  |
|              | <i>Novispirillum itersonii</i>      | 0,525 | 99  | 9E-128 | 87  |
| <b>OTU29</b> | <i>Enterobacter asburiae</i>        | 1     | 100 | 0      | 100 |
|              | <i>Enterobacter xiangfangensis</i>  | 1     | 100 | 0      | 100 |
| <b>OTU30</b> | <i>Bacteroides acidifaciens</i>     | 0,889 | 100 | 0      | 96  |
|              | <i>Bacteroides thetaiotaomicron</i> | 0,843 | 100 | 0      | 95  |
| <b>OTU32</b> | <i>Clostridium hylemonae</i>        | 0,896 | 100 | 0      | 98  |
|              | <i>Ruminococcus gnavus</i>          | 0,83  | 100 | 0      | 96  |
| <b>OTU34</b> | <i>Roseburia faecis</i>             | 0,949 | 100 | 0      | 99  |
|              | <i>Eubacterium rectale</i>          | 0,949 | 100 | 0      | 100 |
| <b>OTU37</b> | <i>Clostridium xylanolyticum</i>    | 0,849 | 100 | 0      | 97  |
|              | <i>Clostridium saccharolyticum</i>  | 0,849 | 100 | 0      | 97  |
| <b>OTU41</b> | <i>Enterobacter kobei</i>           | 0,983 | 100 | 0      | 99  |
|              | <i>Enterobacter cloacae</i>         | 0,966 | 100 | 0      | 99  |
| <b>OTU42</b> | <i>Clostridium scindens</i>         | 1     | 100 | 0      | 100 |
|              | <i>Clostridium hylemonae</i>        | 0,843 | 100 | 0      | 96  |
| <b>OTU43</b> | <i>Terrisporobacter glycolicus</i>  | 0,956 | 100 | 0      | 99  |
|              | <i>Terrisporobacter mayombeii</i>   | 0,951 | 100 | 0      | 99  |
| <b>OTU44</b> | <i>Selenomonas infelix</i>          | 0,983 | 100 | 0      | 99  |
|              | <i>Selenomonas noxia</i>            | 0,896 | 100 | 0      | 97  |
| <b>OTU45</b> | <i>Blautia faecis</i>               | 1     | 100 | 0      | 100 |
|              | <i>Blautia glucerasea</i>           | 0,926 | 100 | 0      | 99  |
| <b>OTU46</b> | <i>Selenomonas infelix</i>          | 0,923 | 100 | 0      | 98  |
|              | <i>Selenomonas noxia</i>            | 0,897 | 100 | 0      | 97  |
| <b>OTU48</b> | <i>Ruminococcus torques</i>         | 0,98  | 100 | 0      | 99  |
|              | <i>Ruminococcus faecis</i>          | 0,89  | 100 | 0      | 98  |

|               |                                      |       |     |        |     |
|---------------|--------------------------------------|-------|-----|--------|-----|
| <b>OTU53</b>  | <i>Stenotrophomonas maltophilia</i>  | 0,978 | 100 | 0      | 98  |
|               | <i>Stenotrophomonas pavanii</i>      | 0,894 | 100 | 0      | 98  |
| <b>OTU60</b>  | <i>Murimonas intestini</i>           | 1     | 100 | 0      | 100 |
|               | <i>Ruminococcus lactaris</i>         | 0,877 | 100 | 0      | 97  |
| <b>OTU65</b>  | <i>Ruminococcus torques</i>          | 0,87  | 100 | 0      | 96  |
|               | <i>Ruminococcus lactaris</i>         | 0,826 | 100 | 0      | 97  |
| <b>OTU78</b>  | <i>Clostridium colinum</i>           | 0,83  | 100 | 0      | 96  |
|               | <i>Eubacterium ventriosum</i>        | 0,638 | 100 | 2E-149 | 90  |
| <b>OTU100</b> | <i>Lactonifactor longoviformis</i>   | 0,811 | 100 | 0      | 96  |
|               | <i>Roseburia intestinalis</i>        | 0,749 | 100 | 4E-176 | 94  |
| <b>OTU119</b> | <i>Anaerofilum pentosovorans</i>     | 0,861 | 100 | 0      | 97  |
|               | <i>Anaerofilum agile</i>             | 0,843 | 100 | 0      | 97  |
| <b>OTU130</b> | <i>Clostridium lactatifermentans</i> | 0,741 | 100 | 3E-167 | 93  |
|               | <i>Clostridium propionicum</i>       | 0,723 | 100 | 6E-179 | 95  |

**Supplementary Table 2: Partial distance based redundancy analysis. The contribution of the different factors, and significance level, to the variation in species level community composition.**

|                              | <b>% variance explained</b> | <b>p-value</b> |
|------------------------------|-----------------------------|----------------|
| <b>Donor</b>                 | 14%                         | 0.041          |
| <b>Treatment</b>             | 20%                         | 0.346          |
| <b>Mucin</b>                 | 8%                          | 0.197          |
| <b><i>A. muciniphila</i></b> | 7%                          | 0.278          |

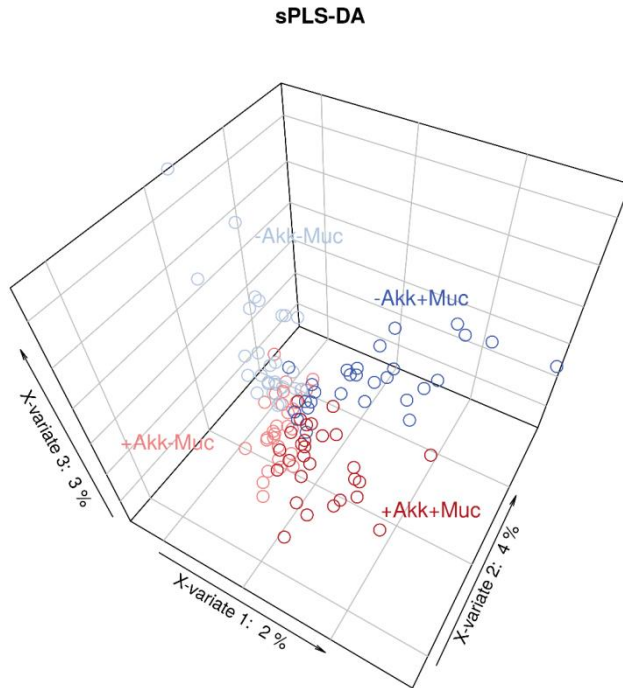

**Supplementary Figure 2: Optimal sPLS-DA model, as determined by fivefold cross-validation, retaining the species most predictive of the different treatments (+Akk+Muc; +Akk-Muc; -Akk+Muc; -Akk-Muc).**

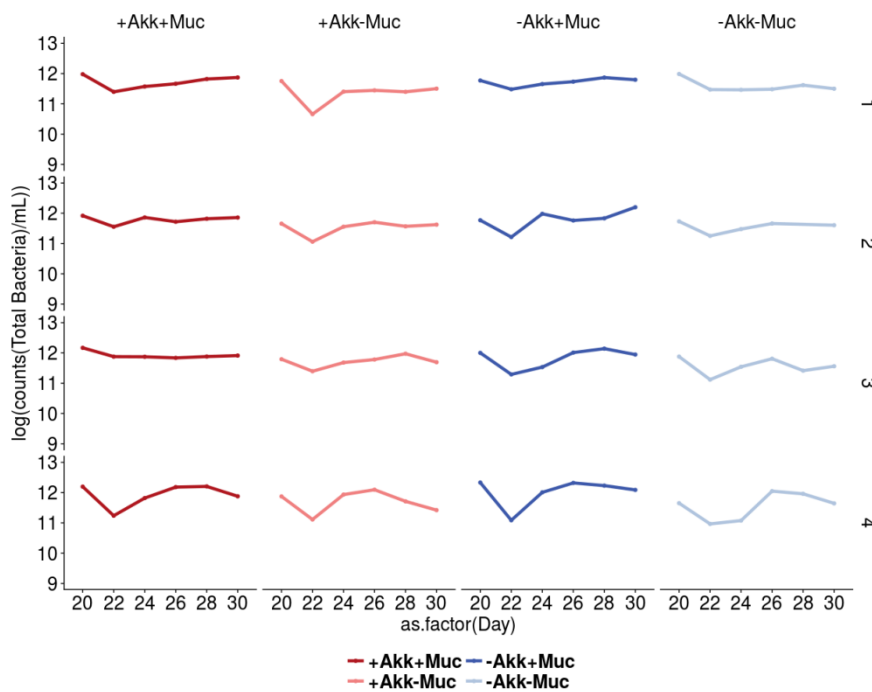

**Supplementary Figure 3: qPCR analysis of 16S rRNA gene showing the response of the total bacterial counts to the antibiotic pulse for the different donors and treatments.**

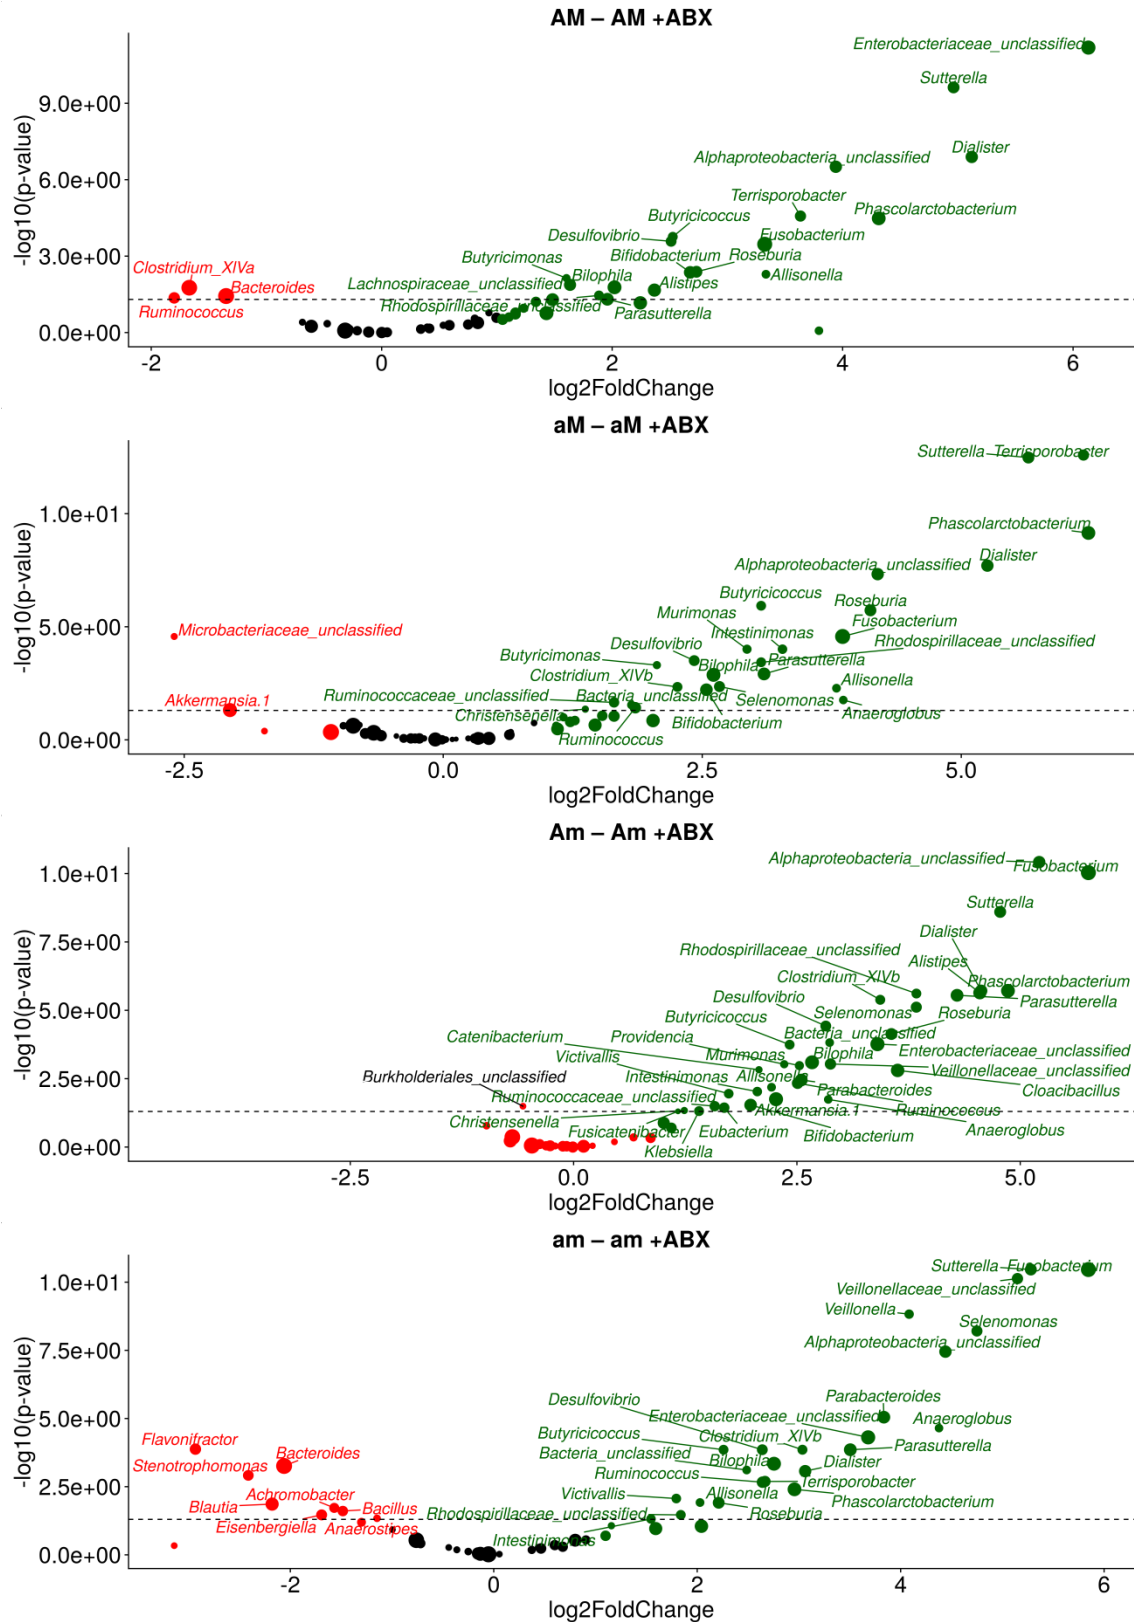

Supplementary Figure 4: Volcano plot showing results from the DESeq2 analysis showing the significantly ( $p < 0.01$ ) affected genera by antibiotic disturbance for each treatment (AM=+Akk+Muc; aM=-Akk+Muc;

Am=+Akk-Muc; am=-Akk-Muc). Green and red dots show OTUs more abundant before and after antibiotic disturbance, respectively, and the size indicates the relative abundance of the OTU in the community.

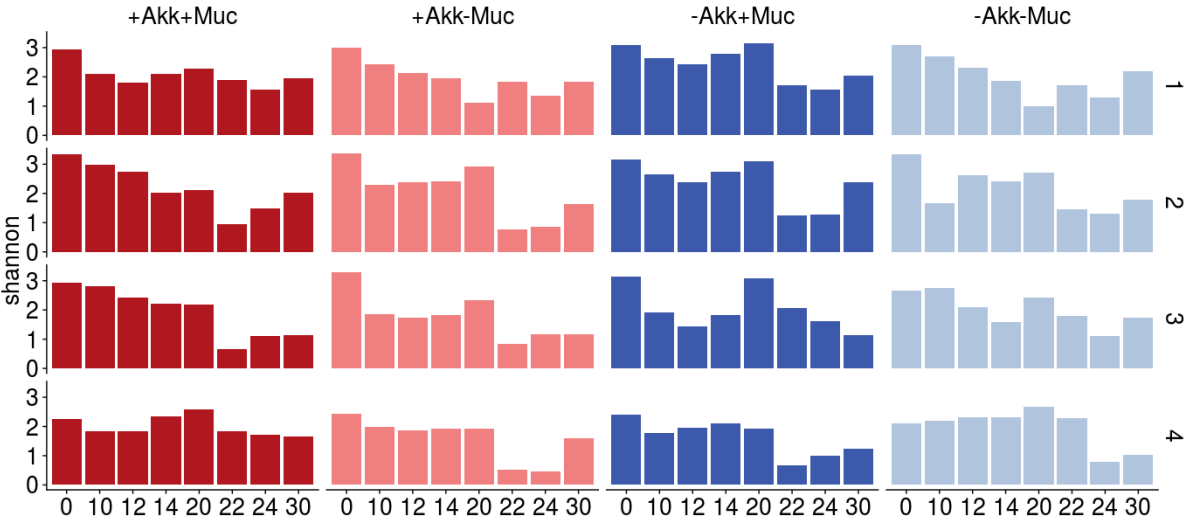

Supplementary Figure 5: Alpha-diversity, measured by Shannon coefficient, over time (Days) for the different donors and treatments.

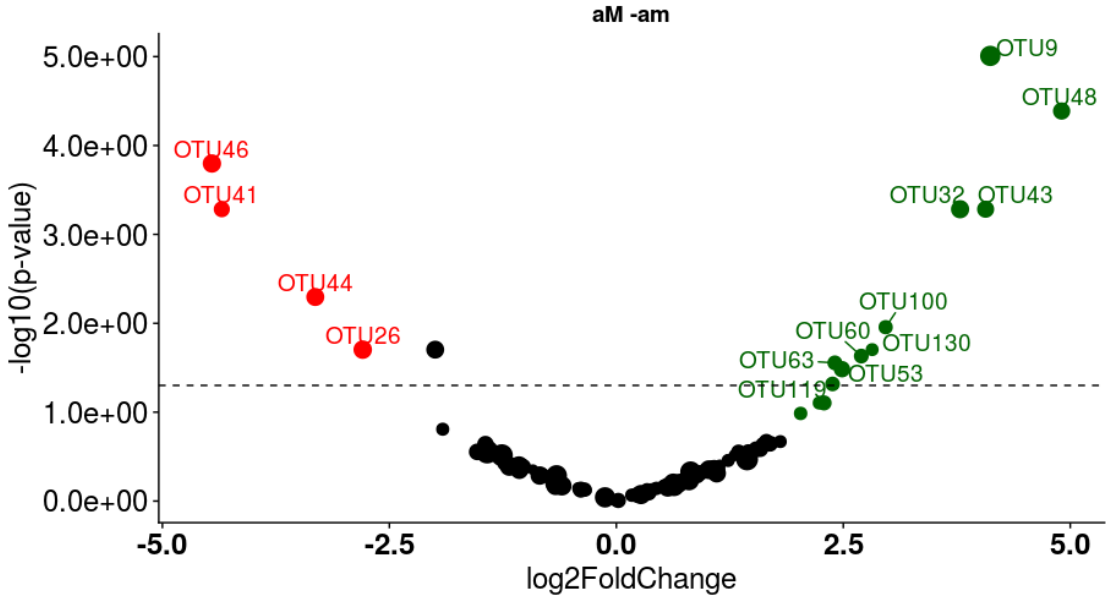

Supplementary Figure 6: Volcano plot showing results from the DESeq2 analysis comparing treatments “+Akk+Muc” and “-Akk+Muc”. Green and red dots show OTUs more abundant in “-Akk+Muc”, respectively, “+Akk+Muc” and the size indicates the relative abundance of the OTU in the community.



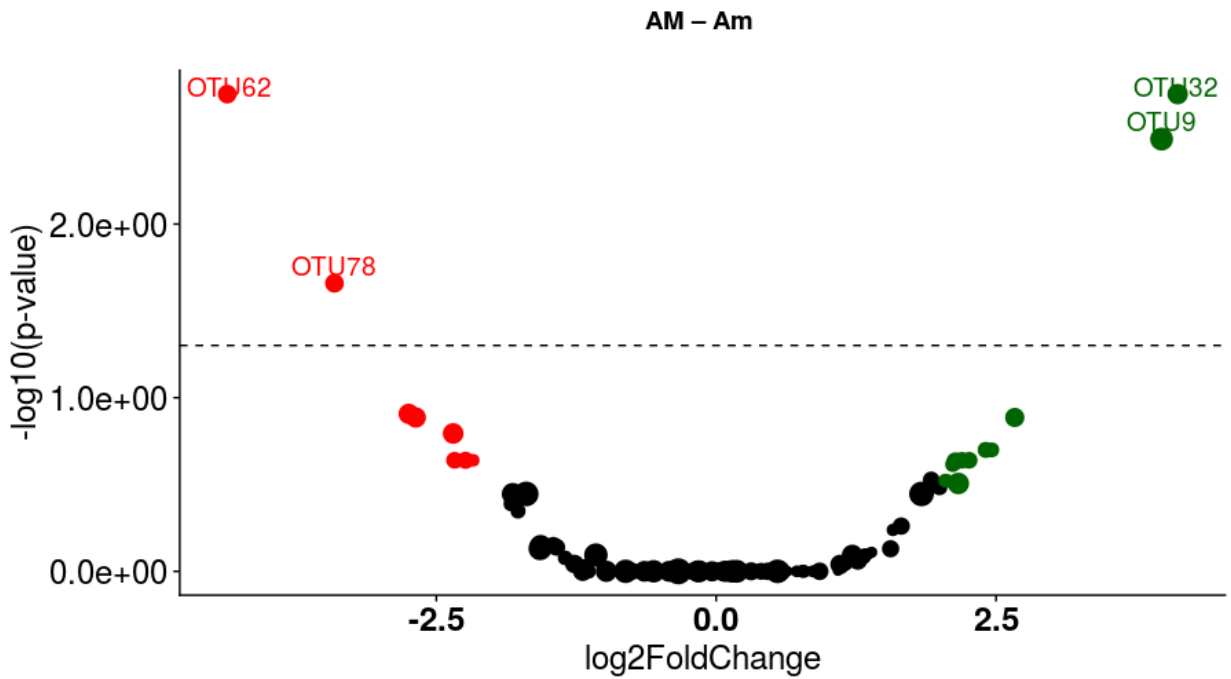

Supplementary Figure 7: Volcano plot showing results from DESeq2 analysis between treatments “+ Akk+Muc” and “+Akk-Muc”. Green dot show OTUs more abundant in “+Akk+Muc”, red dots for “+ Akk- Muc” and the size indicates relative abundance of the OTU in the community.

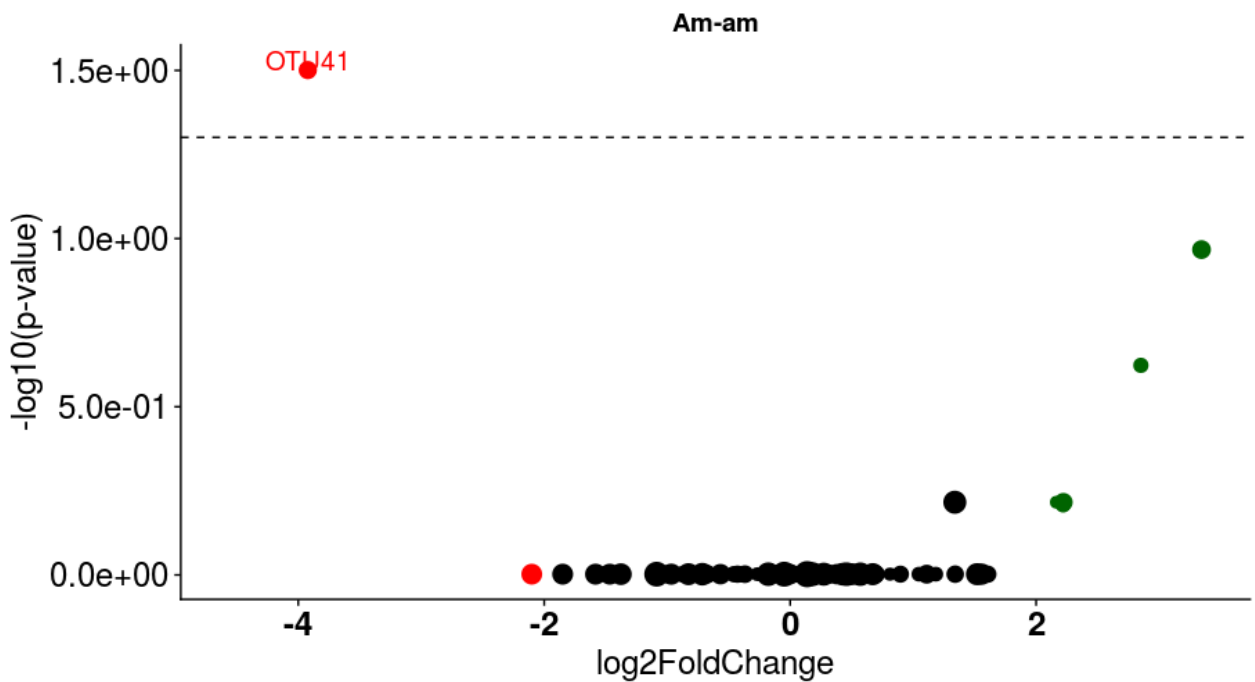

Supplementary Figure 8: Volcano plot showing results from DESeq2 analysis between treatments “+ Akk-Muc” and “-Akk-Muc”. Green dot show OTUs more abundant in “+Akk-Muc”, red dots for “- Akk- Muc” and the size indicates relative abundance of the OTU in the community.

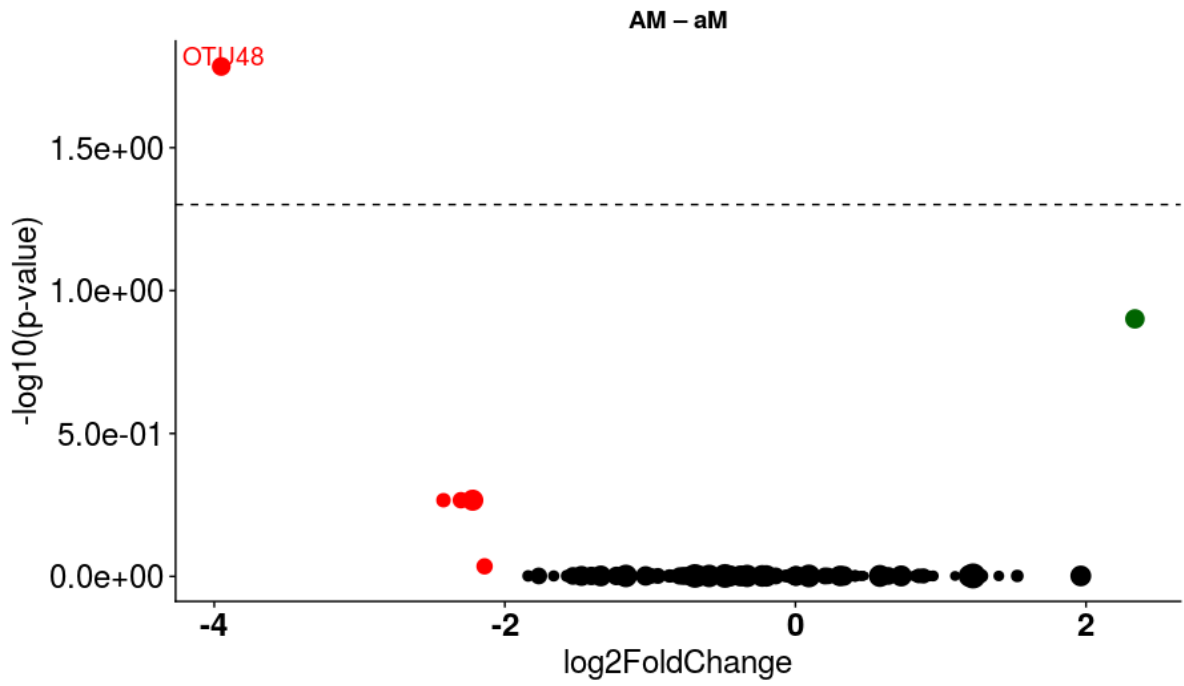

Supplementary Figure 9: Volcano plot showing results from DESeq2 analysis between treatments “+ Akk+Muc” and “-Akk+Muc”. Green dot show OTUs more abundant in “+Akk+Muc”, red dots for “- Akk+ Muc” and the size indicates relative abundance of the OTU in the community.
